# Supplementary material for: Gap-mode excitation, manipulation, and refractive-index sensing application by gold nanocube arrays
Source: Royal Society of Chemistry journal article supplement (doi:10.1039/c8nr09073d), 2019-01-01
Supplement: c8nr09073d1.pdf [file c8nr09073d1.pdf]

Supplemental Information for

# Gap-mode excitation, manipulation, and refractive-index sensing application by gold nanocube arrays

Liang Li,<sup>a,b</sup> Shaolong Wu,<sup>\*a,b</sup> Liuqing Li,<sup>a,b</sup> Zhongyuan Zhou,<sup>a,b</sup> Hao Ding,<sup>a,b</sup> Chenhong Xiao,<sup>a,b</sup> and Xiaofeng Li<sup>\*a,b</sup>

<sup>a</sup>School of Optoelectronic Science and Engineering & Collaborative Innovation Center of Suzhou Nano Science and Technology, Soochow University, Suzhou 215006, China.

<sup>b</sup>Key Lab of Advanced Optical Manufacturing Technologies of Jiangsu Province & Key Lab of Modern Optical Technologies of Education Ministry of China, Soochow University, Suzhou 215006, China.

\*E-mail: shaolong\_wu@suda.edu.cn; xfli@suda.edu.cn

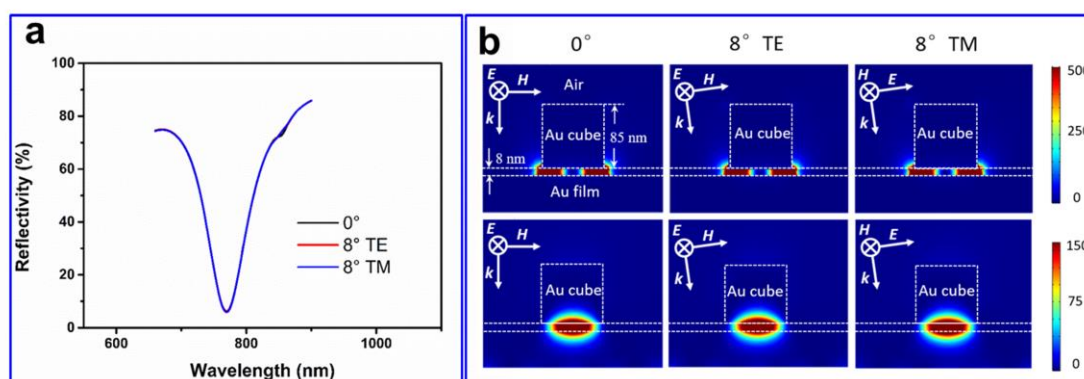

**Fig. S1.** (a) Simulated reflection spectra of the periodical Au NCAs (edge length  $L=85$  nm, period  $P=241$  nm) atop Au film with a spacer (height  $h=8$  nm) under normal incidence or  $8^\circ$  off the normal incidence (as the same as the incident angle used in measurement), (b) the corresponding profiles of normalized electric field ( $|E/E_0|^2$ , the upper row) and magnetic field ( $|H/H_0|^2$ , the lower row) at the wavelength of reflection dip.

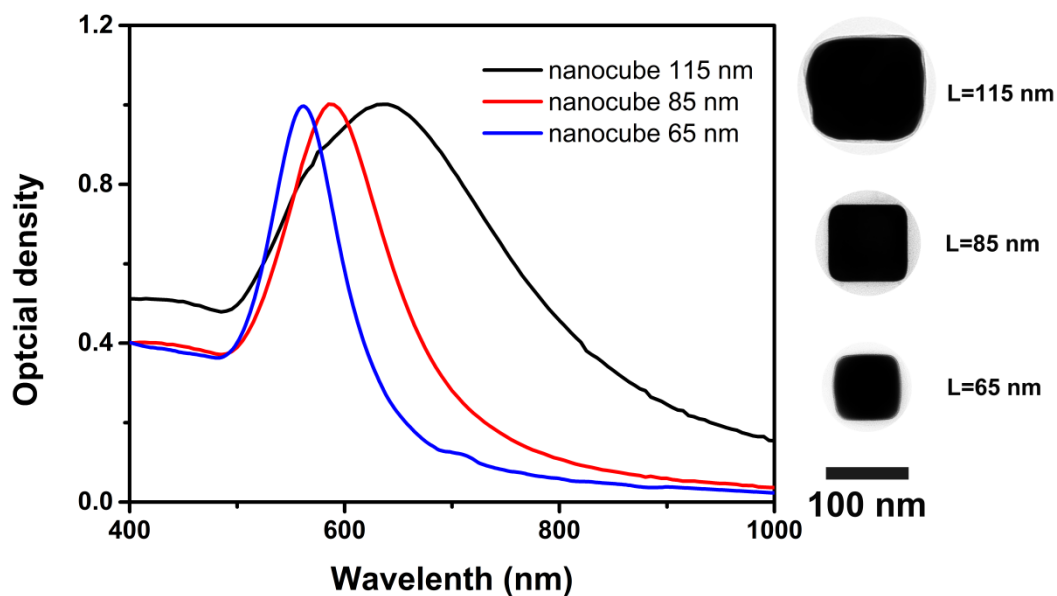

**Fig. S2.** Measured optical density of Au nanocubes in varying sizes (i.e., edge length  $L=65$  nm, 85 nm or 115 nm). The insert on the right column is the corresponding TEM images.

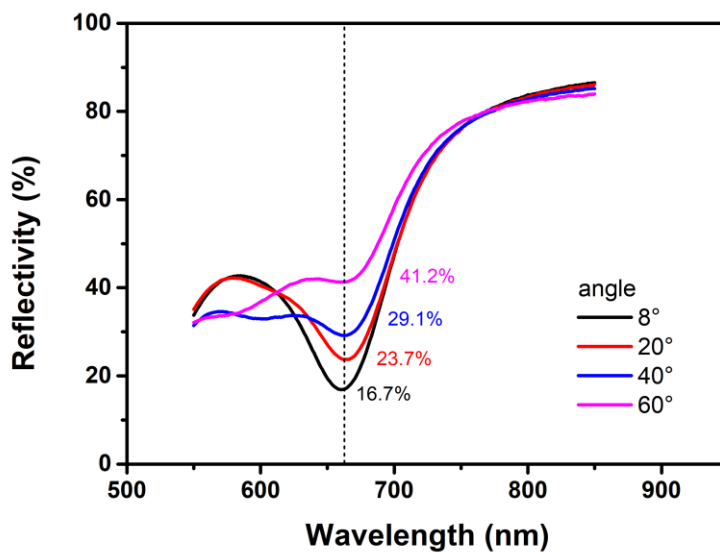

**Fig. S3.** Measured reflectance spectra of the prepared Au NCAs atop the Au film with a spacer (fill fraction  $ff=11.2\%$ , edge length  $L=65$  nm, spacer height  $h=12$  nm) under un-polarized irradiation with various incident angles.
